# Supplementary material
Source: PubMed Central journal article supplement (PMC4394804)
Supplement: AAC.04836-14_zac005153908so1.pdf [file AAC.04836-14_zac005153908so1.pdf]

**TABLE S1** Accession numbers of the influenza A(H1N1)pdm09 viruses used in the phylogenetic trees

| GISAID isolate ID | Isolate name         | Collection date | Week number |
|-------------------|----------------------|-----------------|-------------|
| EPI_ISL_143715    | A/Hiroshima/19/2013  | 17-04-2013      | 16          |
| EPI_ISL_145539    | A/Shizuoka-C/99/2013 | 29-05-2013      | 22          |
| EPI_ISL_154440    | A/Saitama/134/2013   | 28-10-2013      | 44          |
| EPI_ISL_153618    | A/Kanagawa/146/2013  | 11-11-2013      | 46          |
| EPI_ISL_154135    | A/Yamagata/157/2013  | 14-11-2013      | 46          |
| EPI_ISL_154136    | A/Yamagata/158/2013  | 14-11-2013      | 46          |
| EPI_ISL_152910    | A/Sapporo/107/2013   | 15-11-2013      | 46          |
| EPI_ISL_152927    | A/Sapporo/114/2013   | 24-11-2013      | 47          |
| EPI_ISL_152931    | A/Sapporo/TH1/2013   | 25-11-2013      | 48          |
| EPI_ISL_152928    | A/Sapporo/116/2013   | 26-11-2013      | 48          |
| EPI_ISL_157055    | A/Kanagawa/152/2013  | 06-Dec-2013     | 49          |
| EPI_ISL_154457    | A/Kawasaki/62/2013   | 06-Dec-2013     | 49          |
| EPI_ISL_152929    | A/Sapporo/119/2013   | 07-Dec-2013     | 49          |

---

|                |                    |             |    |
|----------------|--------------------|-------------|----|
| EPI_ISL_152930 | A/Sapporo/120/2013 | 09-Dec-2013 | 50 |
| EPI_ISL_154461 | A/Sakai/23/2013    | 15-Dec-2013 | 50 |
| EPI_ISL_159032 | A/Chiba-c/49/2013  | 16-Dec-2013 | 51 |
| EPI_ISL_153916 | A/Sapporo/125/2013 | 19-Dec-2013 | 51 |
| EPI_ISL_153112 | A/Mie/27/2013      | 25-Dec-2013 | 52 |
| EPI_ISL_153917 | A/Sapporo/126/2013 | 25-Dec-2013 | 52 |
| EPI_ISL_159035 | A/Mie/1/2014       | 04-Jan-2014 | 1  |
| EPI_ISL_159036 | A/Mie/2/2014       | 06-Jan-2014 | 2  |
| EPI_ISL_153918 | A/Sapporo/1/2014   | 06-Jan-2014 | 2  |
| EPI_ISL_154676 | A/Sapporo/2/2014   | 07-Jan-2014 | 2  |
| EPI_ISL_156432 | A/Hokkaido/2/2014  | 07-Jan-2014 | 2  |
| EPI_ISL_157412 | A/Tokyo/32556/2014 | 08-Jan-2014 | 2  |
| EPI_ISL_154677 | A/Sapporo/3/2014   | 08-Jan-2014 | 2  |
| EPI_ISL_154678 | A/Sapporo/4/2014   | 09-Jan-2014 | 2  |
| EPI_ISL_159039 | A/Kochi/1/2014     | 09-Jan-2014 | 2  |
| EPI_ISL_155839 | A/Osaka/8/2014     | 09-Jan-2014 | 2  |

---

---

|                |                    |             |   |
|----------------|--------------------|-------------|---|
| EPI_ISL_159034 | A/Yamaguchi/2/2014 | 09-Jan-2014 | 2 |
| EPI_ISL_154679 | A/Sapporo/5/2014   | 10-Jan-2014 | 2 |
| EPI_ISL_154680 | A/Sapporo/6/2014   | 10-Jan-2014 | 2 |
| EPI_ISL_154683 | A/Sapporo/9/2014   | 10-Jan-2014 | 2 |
| EPI_ISL_156433 | A/Hokkaido/3/2014  | 10-Jan-2014 | 2 |
| EPI_ISL_156434 | A/Hokkaido/4/2014  | 10-Jan-2014 | 2 |
| EPI_ISL_154681 | A/Sapporo/7/2014   | 14-Jan-2014 | 3 |
| EPI_ISL_156439 | A/Sapporo/13/2014  | 14-Jan-2014 | 3 |
| EPI_ISL_156443 | A/Sapporo/18/2014  | 14-Jan-2014 | 3 |
| EPI_ISL_156819 | A/Ehime/1/2014     | 14-Jan-2014 | 3 |
| EPI_ISL_156436 | A/Kochi/2/2014     | 16-Jan-2014 | 3 |
| EPI_ISL_156445 | A/Sapporo/21/2014  | 17-Jan-2014 | 3 |
| EPI_ISL_156449 | A/Sapporo/25/2014  | 17-Jan-2014 | 3 |
| EPI_ISL_156446 | A/Sapporo/22/2014  | 18-Jan-2014 | 3 |
| EPI_ISL_156441 | A/Sapporo/16/2014  | 20-Jan-2014 | 4 |
| EPI_ISL_156442 | A/Sapporo/17/2014  | 20-Jan-2014 | 4 |

---

---

|                |                   |             |   |
|----------------|-------------------|-------------|---|
| EPI_ISL_156444 | A/Sapporo/19/2014 | 20-Jan-2014 | 4 |
| EPI_ISL_156447 | A/Sapporo/23/2014 | 20-Jan-2014 | 4 |
| EPI_ISL_156448 | A/Sapporo/24/2014 | 20-Jan-2014 | 4 |
| EPI_ISL_159041 | A/Kochi/3/2014    | 20-Jan-2014 | 4 |
| EPI_ISL_156841 | A/Ehime/5/2014    | 21-Jan-2014 | 4 |
| EPI_ISL_156828 | A/Sapporo/40/2014 | 22-Jan-2014 | 4 |
| EPI_ISL_156830 | A/Sapporo/42/2014 | 22-Jan-2014 | 4 |
| EPI_ISL_156831 | A/Sapporo/43/2014 | 23-Jan-2014 | 4 |
| EPI_ISL_156435 | A/Hokkaido/5/2014 | 23-Jan-2014 | 4 |
| EPI_ISL_160237 | A/Gifu-c/18/2014  | 23-Jan-2014 | 4 |
| EPI_ISL_157414 | A/Hyogo/1190/2014 | 25-Jan-2014 | 4 |
| EPI_ISL_156820 | A/Sapporo/29/2014 | 25-Jan-2014 | 4 |
| EPI_ISL_156822 | A/Sapporo/32/2014 | 25-Jan-2014 | 4 |
| EPI_ISL_156823 | A/Sapporo/33/2014 | 25-Jan-2014 | 4 |
| EPI_ISL_157415 | A/Hokkaido/9/2014 | 25-Jan-2014 | 4 |
| EPI_ISL_156825 | A/Sapporo/35/2014 | 27-Jan-2014 | 5 |

---

---

|                |                    |             |   |
|----------------|--------------------|-------------|---|
| EPI_ISL_156833 | A/Sapporo/45/2014  | 27-Jan-2014 | 5 |
| EPI_ISL_159043 | A/Kochi/5/2014     | 27-Jan-2014 | 5 |
| EPI_ISL_156849 | A/Saitama/49/2014  | 27-Jan-2014 | 5 |
| EPI_ISL_156438 | A/Yokohama/24/2014 | 27-Jan-2014 | 5 |
| EPI_ISL_160238 | A/Gifu-c/21/2014   | 28-Jan-2014 | 5 |
| EPI_ISL_157416 | A/Hokkaido/18/2014 | 28-Jan-2014 | 5 |
| EPI_ISL_158797 | A/Sapporo/63/2014  | 28-Jan-2014 | 5 |
| EPI_ISL_156844 | A/Sapporo/62/2014  | 29-Jan-2014 | 5 |
| EPI_ISL_156842 | A/Ishikawa/38/2014 | 29-Jan-2014 | 5 |
| EPI_ISL_158180 | A/Tokyo/32668/2014 | 29-Jan-2014 | 5 |
| EPI_ISL_156850 | A/Kobe/274/2014    | 30-Jan-2014 | 5 |
| EPI_ISL_158791 | A/Sapporo/54/2014  | 30-Jan-2014 | 5 |
| EPI_ISL_156843 | A/Sapporo/59/2014  | 30-Jan-2014 | 5 |
| EPI_ISL_159038 | A/Mie/13/2014      | 01-Feb-2014 | 5 |
| EPI_ISL_157052 | A/Osaka-c/43/2014  | 02-Feb-2014 | 5 |
| EPI_ISL_156846 | A/Sapporo/69/2014  | 03-Feb-2014 | 6 |

---

---

|                |                      |             |    |
|----------------|----------------------|-------------|----|
| EPI_ISL_158802 | A/Sapporo/71/2014    | 03-Feb-2014 | 6  |
| EPI_ISL_158179 | A/Tokyo/32026/2014   | 03-Feb-2014 | 6  |
| EPI_ISL_156845 | A/Sapporo/65/2014    | 04-Feb-2014 | 6  |
| EPI_ISL_160236 | A/Shizuoka/30/2014   | 04-Feb-2014 | 6  |
| EPI_ISL_158805 | A/Sapporo/75/2014    | 05-Feb-2014 | 6  |
| EPI_ISL_160240 | A/Sapporo/83/2014    | 06-Feb-2014 | 6  |
| EPI_ISL_157413 | A/Yamagata/88/2014   | 10-Feb-2014 | 7  |
| EPI_ISL_159389 | A/Wakayama-c/76/2014 | 10-Mar-2014 | 11 |

---
